# Supplementary material for: Arterial blood gas analysis in dogs with bronchomalacia
Source: PLoS One. 2019 Dec 31;14(12):e0227194. doi: 10.1371/journal.pone.0227194 (PMC6938372; doi:10.1371/journal.pone.0227194)
Supplement: S1 Table — (XLSX) [file pone.0227194.s001.xlsx]

## Sheet: Sheet1
Case No.	Breed	Age (year)	Gender	Body weight (kg)	Concurrent disease
1	Pug	15	female (neutered)	5.2	elongated soft palate
2	Mix	11	male (neutered)	5.2
3	Maltese	12	male (neutered)	3.1
4	French Bulldog	7	female (neutered)	10.3	elongated soft palate
5	Pug	11	male (neutered)	9.4
6	Toy Poodle	12	male (neutered)	5.4
7	French Bulldog	11	female (neutered)	9.4	elongated soft palate
8	Pomeranian	11	male (neutered)	5.9
9	Miniature Pinscher	13	male	4.4	myxomatous mitral valve disease, interstitial pneumonia
10	Chihuahua	8	female (neutered)	2.6	interstitial pneumonia
11	Pug	10	male (neutered)	9.7	myxomatous mitral valve disease with pulmonary edema
